# Supplementary material for: Datasets on the genomic positions of the MLL1 morphemes, the ZFP57 binding site, and ZFBS-Morph overlaps in the build mm9 of the mouse genome
Source: PubMed Central journal article supplement (PMC5458072; doi:10.1016/j.dib.2017.05.050), 2017-05-28
Supplement: mmc1.pdf [file mmc1.pdf]

conflicts of interest: none
